# Supplementary material for: GeneXplorer: an interactive web application for microarray data visualization and analysis
Source: Springer Nature journal article supplement (doi:10.1186/1471-2105-5-141), 2004-10-01

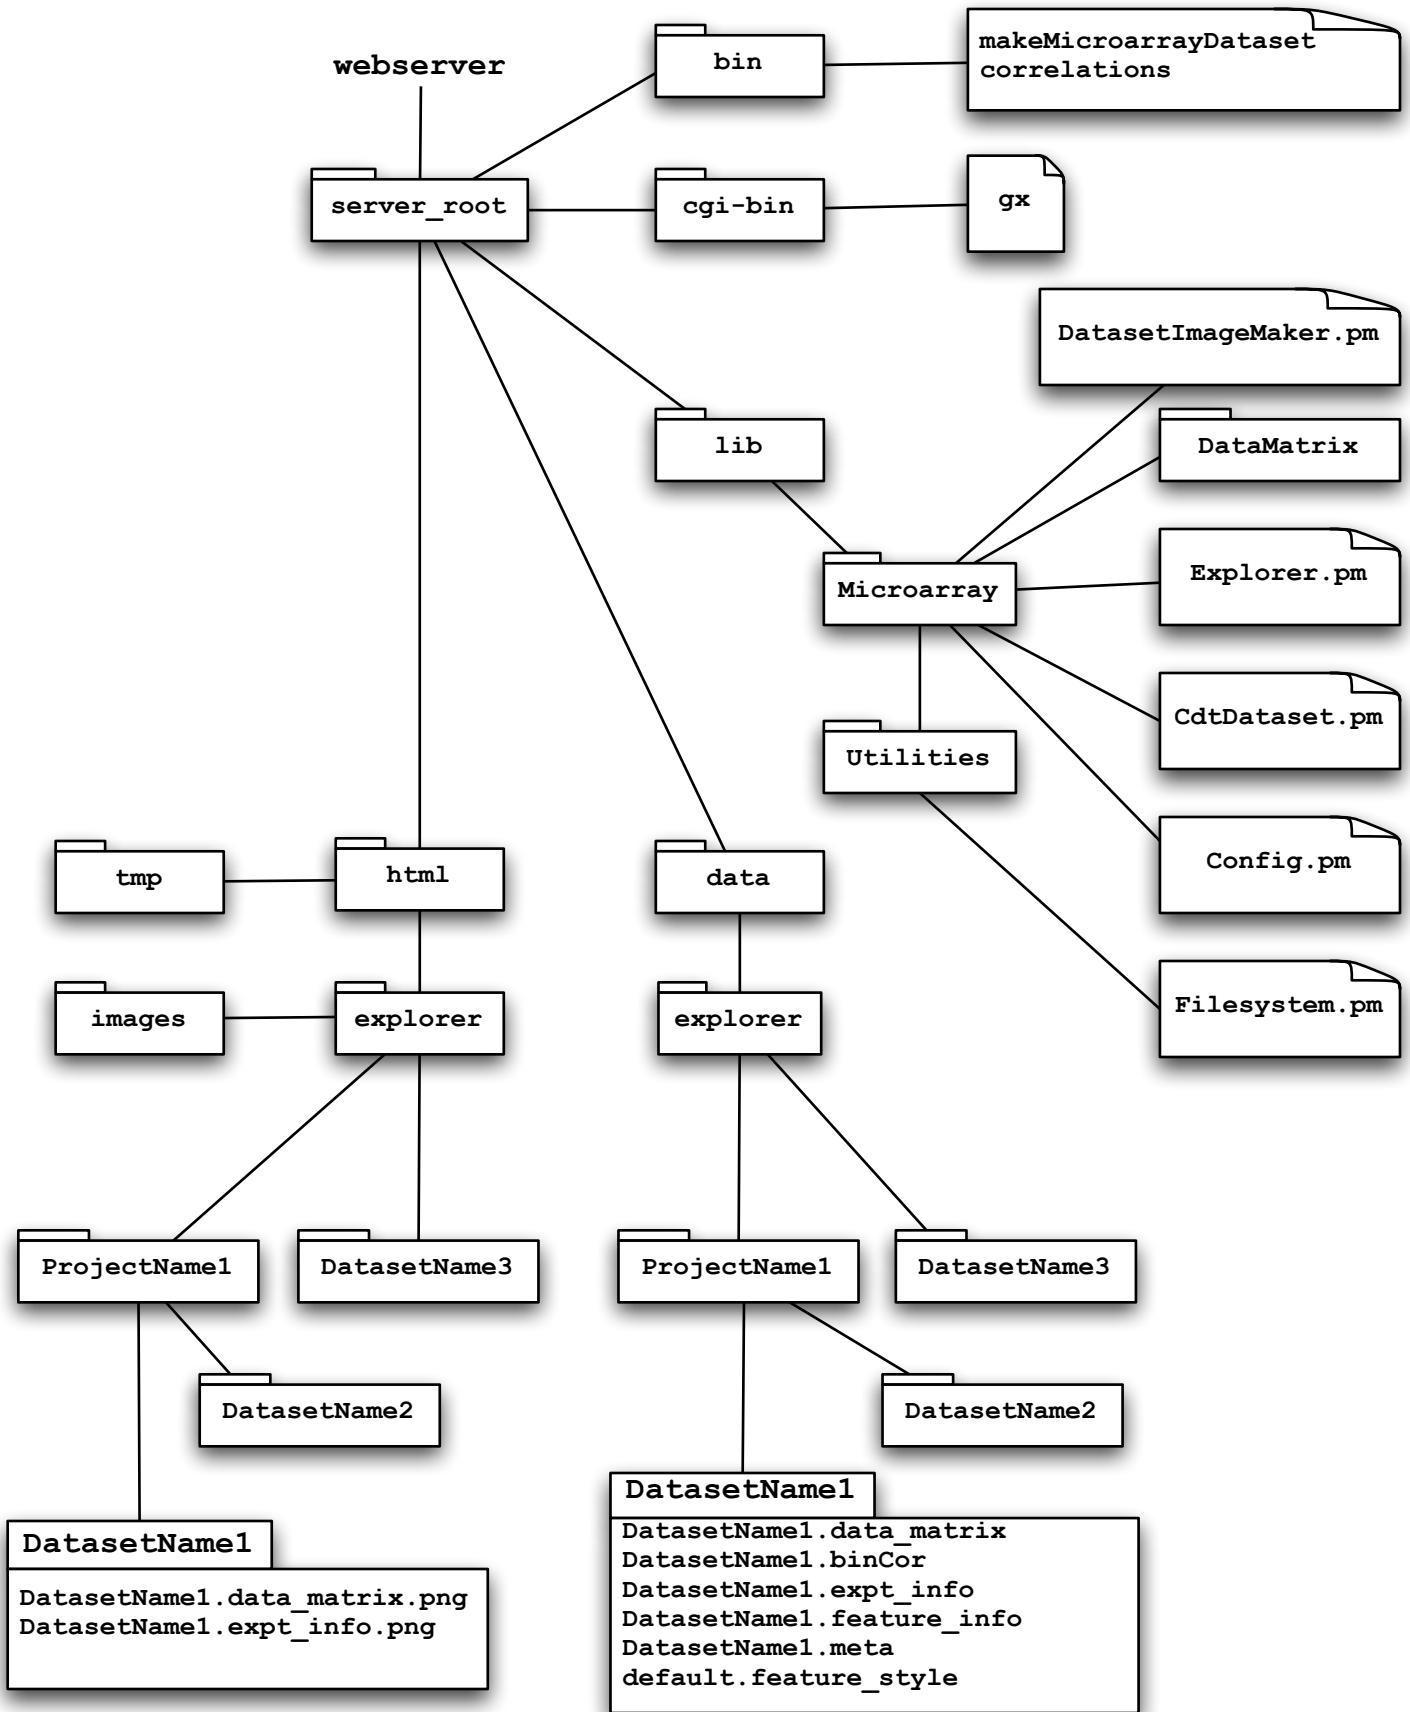

Supplement: 12859_2004_257_MOESM2_ESM.pdf [file 12859_2004_257_MOESM2_ESM.pdf]
